# Supplementary material for: Interpretable machine learning models for predicting tocilizumab response in rheumatoid arthritis using clinical data
Source: Research Square preprint supplement (doi:10.21203/rs.3.rs-6420083/v1), 2025-05-09
Supplement: Supplementary file 1 [file 860e35ec6e5d211763e20c90.docx]

Supplementary material

Supply table1

Comparison of therapeutic efficacy distribution in patients with different imaging stages

|  | Stage 0 | Stage Ⅰ | Stage Ⅱ | Stage Ⅲ | Stage Ⅳ | P value |
| --- | --- | --- | --- | --- | --- | --- |
| N(%) | 55(22.4%) | 130(53.0%) | 36(14.6%) | 13(5.3%) | 11(4.4%) |  |
| effective group | 42(76.3%) | 86(66.1%) | 30(83.3%) | 8(61.5%) | 7(63.6%) | 0.2224 |
| ineffective group | 13(23.6%) | 44(33.8%) | 6(16.6%) | 5(38.4%) | 4(36.3%) |  |

Supplementary Table 2

Differences in baseline clinical indicators among patients in the five groups of imaging stages screened by ANOVA test and Kruskal-Wallis H test

|  | Stage 0 | Stage Ⅰ | Stage Ⅱ | Stage Ⅲ | Stage Ⅳ | P value |
| --- | --- | --- | --- | --- | --- | --- |
| Total | 55 | 130 | 36 | 13 | 10 |  |
| Gender,n(%) |  |  |  |  |  | 0.3205 |
| male | 9(16.3%) | 14(10.7%) | 5(13.8%) | 0 | 0 |  |
| female | 46(83.6%) | 116(89.2%) | 31(86.1%) | 13(100%) | 11(100%) |  |
| Age,years | 51.50(36.75,64.20) | 56.00(46.00,64.00) | 54.00(49.00,58.00) | 55.00(37.25,64.75) | 56.00(49.00,60.00) | 0.920 |
| BMI,Kg/m2 | 24.65±3.99 | 24.52±4.45 | 23.87±4.23 | 21.12±2.93 | 25.24±4.86 | 0.07 |
| Duration,months | 54.00(19.50,162.00) | 60.00(15.00,216.00) | 84.00(12.00,204.00) | 150.00(69.00,242.25.00) | 168.00(120.00,240.00) | 0.002* |
| Morning stiffness,minutes | 60.00(30.00,60.00) | 60.00(30.00,120.00) | 60.00(10.00,60.00) | 60.00(30.00,60.00) | 60.00(20.00,60.00) | 0.113 |
| RF positive,n(%) | 35(63.6%) | 89(68.4%) | 33(91.6) | 9(69.2%) | 8(72.7%) | 0.053 |
| TJC,n(%) | 2.00(0.00,5.5) | 5.00(1.00,10.00) | 8.00(2.00,16.00) | 10.50(8.25,12.00) | 8.00(3.00,28.00) | ＜0.01* |
| SJC,n(%) | 0.00(0.00,2.25) | 3.00(0.00,6.00) | 2.00(0.00,4.00) | 4.00(1.00,9.00) | 4.00(0.00,7.00) | 0.04* |
| ESR,mm/h | 24.50(6.50,40.00) | 33.00(11.00,57.00) | 35.00(15.00,51.00) | 40.50(19.25,44.75) | 20.00(4.00,49.00) | 0.028* |
| CRP,mg/L | 8.23(2.65,16.78) | 10.40(2.98,30.95) | 10.90(2.83,22.16) | 8.26(3.46,37.18) | 2.89(0.11,16.22) | 0.198 |
| DAS28（ESR） | 3.11(2.28,4.52) | 4.68(3.09,6.05) | 4.68(3.41,6.28) | 5.99(4.22,6.58) | 4.83(3.56,7.56) | ＜0.01* |
| DAS28（CRP) | 3.56±1.70 | 3.69±1.61 | 4.80±1.57 | 4.86±1.76 | 4.74±1.74 | ＜0.01* |
| CDAI | 5.90(1.88,17.15) | 16.20(6.70,26.30) | 24.80(9.70,32.90) | 29.00(19.23,33.17) | 18.60(8.00,50.70) | ＜0.01* |
| SDAI | 7.98(2.85,19.06) | 17.87(8.56,30.59) | 25.30(10.90,40.29) | 30.11(19.98,34.92) | 18.79(9.62,51.33) | ＜0.01* |
| PGA | 20.50(12.00,43.25) | 39.00(18.00,50.00) | 48.00(27.00,61.00) | 69.00(47.25,81.75) | 41.00(23.00,81.00) | ＜0.01* |
| EGA | 15.50(7.00,38.75) | 30.00(14.00,45.00) | 45.00(20.00,65.00) | 62.00(40.00,77.00) | 37.00(17.00,76.00) | ＜0.01* |
| WBC,cells/109 | 5.58(4.32,6.79) | 5.10(4.12,6.25) | 5.77(5.13,8.47) | 6.74(3.88,8.37) | 5.82(3.31,9.19) | 0.179 |
| RBC,cells/1012 | 3.90(3.47,4.48) | 4.15(3.74,4.40) | 4.21(3.68,4.56) | 4.38(3.63,4.88) | 4.04(3.54,4.75) | 0.726 |
| HGB,g/L | 113.50(102.50,122.00) | 114.00(100.00,126.00) | 114.00(108.00,124.00) | 104.50(100.75,124.75) | 115.00(89.00,129.00) | 0.624 |
| PLT,cells/109 | 252.00(213.25,318.25) | 263.00(211.00,358.00) | 338.00(263.00,378.00) | 293.50(242.25,361.25) | 312.00(182.00,348.00) | ＜0.01* |
| N,cell/[μL](https://www.mathconverse.com/zh-hans/%E5%AE%9A%E4%B9%89/%E5%8D%95%E4%BD%8D/%E5%BE%AE%E5%8D%87/" \t "https://cn.bing.com/_blank) | 3.91(2.54,4.93) | 3.03(2.30,4.12) | 3.38(3.03,5.26) | 4.35(3.63,5.12) | 3.87(1.84,5.41) | 0.115 |
| L,cell/[μL](https://www.mathconverse.com/zh-hans/%E5%AE%9A%E4%B9%89/%E5%8D%95%E4%BD%8D/%E5%BE%AE%E5%8D%87/" \t "https://cn.bing.com/_blank) | 1.36(1.18,1.68) | 1.52(1.16,1.77) | 1.60(1.21,2.17) | 1.76(1.12,2.24) | 1.33(1.24,2.74) | 0.926 |
| IL-6,pg/ml | 12.66(2.50,37.75) | 12.90(3.20,36.20) | 14.00(5.00,39.40) | 38.40(13.70,119.95) | 48.60(6.00,80.80) | 0.187 |
| D-dimer,mg/L | 0.60(0.31,1.09) | 1.05(0.60,3.86) | 1.02(0.52,3.19) | 1.08(0.74,5.89) | 0.90(0.36,1.09) | 0.043* |
| CD4cnt,cell/[μL](https://www.mathconverse.com/zh-hans/%E5%AE%9A%E4%B9%89/%E5%8D%95%E4%BD%8D/%E5%BE%AE%E5%8D%87/" \t "https://cn.bing.com/_blank) | 615.83(433.54，1024.43) | 705.53(479.00，971.00) | 510.00(49.59，777.00) | 642.42(42.29，1547.89) | 779.00(579.00，820.00) | 0.078 |
| NKT,cell/[μL](https://www.mathconverse.com/zh-hans/%E5%AE%9A%E4%B9%89/%E5%8D%95%E4%BD%8D/%E5%BE%AE%E5%8D%87/" \t "https://cn.bing.com/_blank) | 44.50(30.00，73.00) | 66.00(40.00，139.00) | 72.00(40.00，150.00) | 100.50(39.75，138.75) | 85.00(43.00，118.00) | 0.714 |
| RF,IU/ml | 40.10(0.00，248.00) | 114.00(23.50，281.00) | 124.00(60.00，291.00) | 54.35(9.93，451.25) | 59.60(24.50，257.00) | 0.227 |
| CCP,U/ml | 463.55(63.55，2063.33) | 1025.00(207.80，2843.70) | 637.10(218.00，2058.60) | 53.80(0.00，449.58) | 56.60(0.00，1288.00) | 0.372 |
| ANA,n(%) | 100.00(0.00，155.00) | 100.00(0.00，320.00) | 100.00(0.00，320.00) | 100.00(25.00，265.00) | 100.00(0.00，100.00) | 0.929 |
| dsDNA,U/ml | 10.00(10.00,10.00) | 10.00(10.00,10.00) | 10.00(10.00,10.00) | 10.00(10.00,10.00) | 10.00(10.00,10.00) | 0.892 |
| AFP,ng/mL | 2.00(2.00,2.73) | 2.08(2.00,3.24) | 2.33(2.12,2.83) | 2.00(1.54,2.49) | 2.00(2.00,2.73) | 0.008* |
| CEA,ng/mL | 1.73(1.73,2.07) | 1.73(1.73,2.26) | 1.73(1.73,1.85) | 1.85(1.73,2.14) | 2.55(1.73,4.03) | 0.260 |
| CA125,U/mL | 14.35(9.55,20.76) | 14.10(9.90,19.90) | 13.90(9.00,20.30) | 17.50(9.83,33.43) | 11.70(8.80,18.80) | 0.814 |
| CA153,U/mL | 8.55(6.67,14.30) | 9.70(7.00,13.60) | 8.80(6.10,16.80) | 12.90(7.35,15.08) | 13.80(8.10,21.00) | 0.186 |
| CA199,U/mL | 3.20(2.06,5.54) | 3.55(2.06,12.96) | 2.06(2.06,3.41) | 7.61(2.26,14.47) | 10.02(4.72,12.60) | 0.010 |
| SCC,ng/L | 3.20(0.50,0.90) | 3.55(0.50,1.00) | 2.06(0.40,1.00) | 7.61(0.55,1.83) | 10.02(0.50,1.30) | 0.650 |

*p＜0.05 is statistically significant.
